# Supplementary material for: Three unprecedented open frameworks based on a pyridyl-carboxylate: synthesis, structures and properties
Source: Royal Society of Chemistry journal article supplement (doi:10.1039/c2ce05948g), 2011-12-20
Supplement: c2ce05948g.pdf [file c2ce05948g.pdf]

## Supporting Information

# Three Unprecedented Open Frameworks Based on a Pyridyl-carboxylate: Synthesis, Structures and Properties

Shengqun Su, Wan Chen, Xuezhi Song, Min Zhu, Chao Qin, Shuyan Song, Zhiyong Guo, Song Wang, Zhaoming Hao, Hongjie Zhang\*

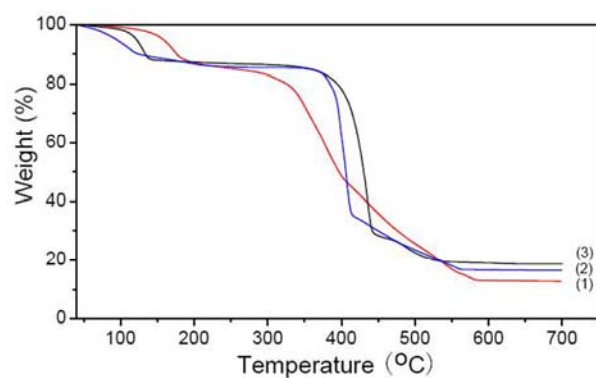

**Fig. S1.** TGA curve for 1-3. The sample was heated to 700 °C at the heating rate of 10 °C/min

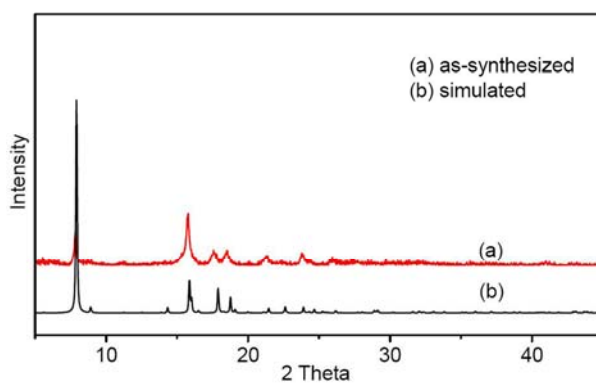

**Fig. S2.** The X-ray powder diffraction patterns for compound 1.

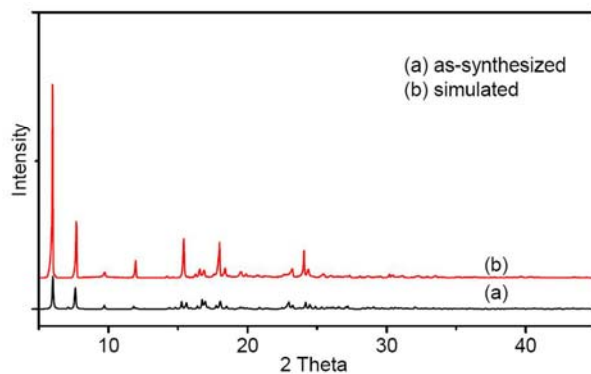

**Fig. S3.** The X-ray powder diffraction patterns for compound 2.

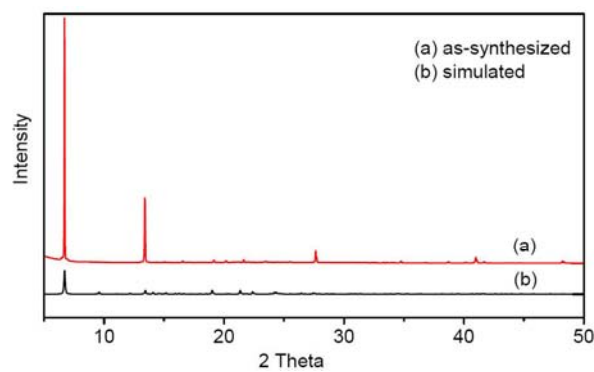

**Fig. S4.** The X-ray powder diffraction patterns for compound 3.

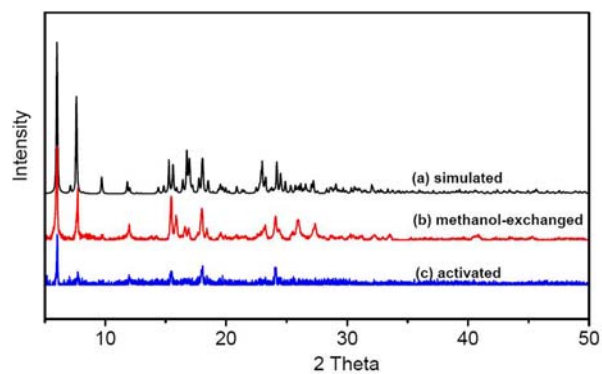

**Fig. S5.** XPRD patterns of the compound 2, (b) methanol exchanged, (c) activated.
